# Supplementary material for: The genome of broomcorn millet
Source: PubMed Central journal article supplement (PMC6347628; doi:10.1038/s41467-019-08409-5), 2019-01-25
Supplement: 41467_2019_8409_MOESM1_ESM.pdf [file 41467_2019_8409_MOESM1_ESM.pdf]

## **Supplementary Figures and Tables**

**The Genome of Broomcorn Millet**  
**by Changsong Zou et al.**

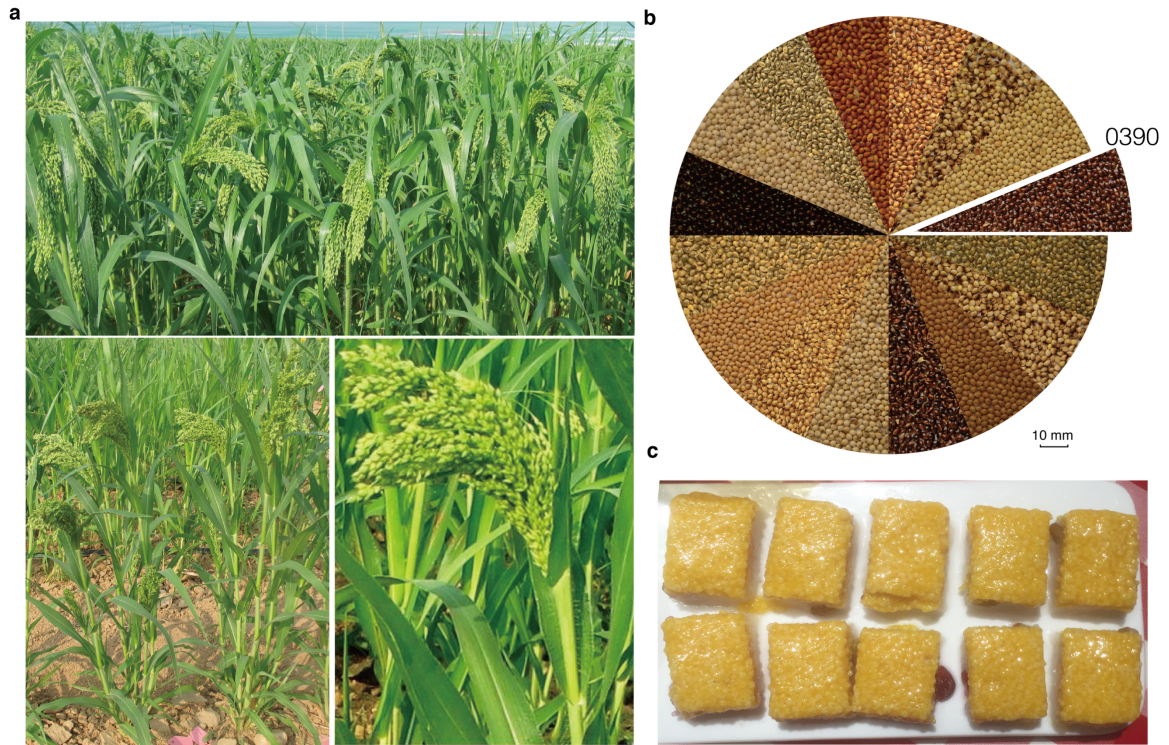

**Supplementary Figure 1** Pictures for broomcorn millet and its product. (a) Broomcorn millet growing in the field. (b) Broomcorn millet grains from different accessions. The separated sector (0390) indicates the seeds of the accession used for genome sequencing in this study. (c) Cakes made from waxy broomcorn millet grains.

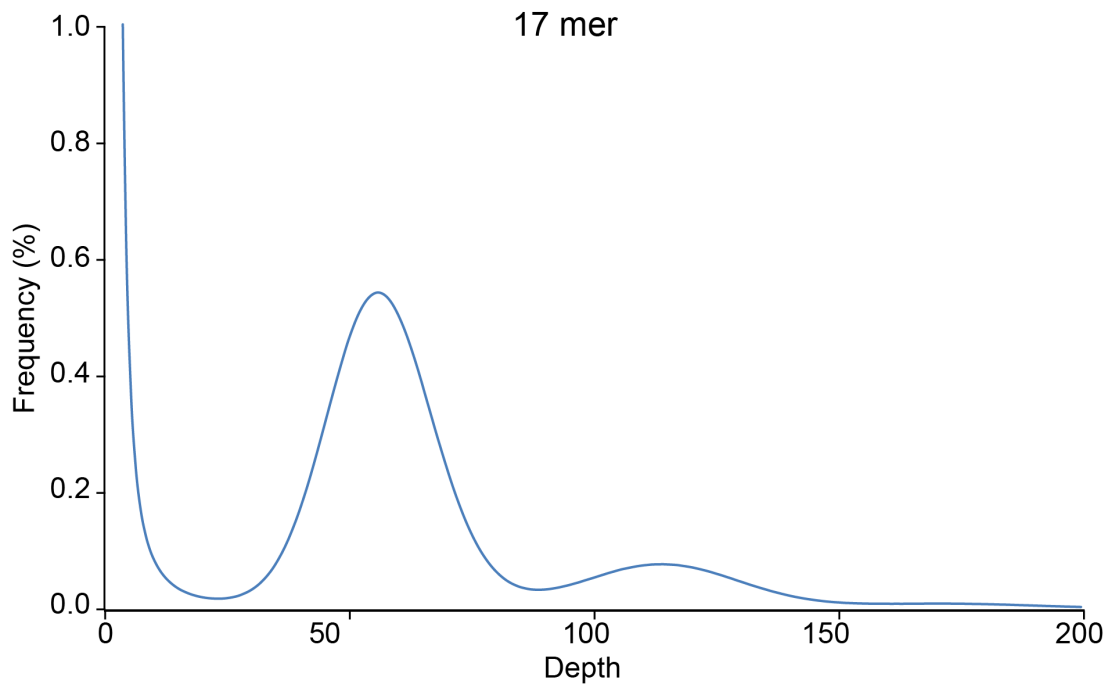

| K-mer | K-mer Number   | Peak Depth | Genome Size (bp) | Used Bases     | Used Reads  | Depth |
|-------|----------------|------------|------------------|----------------|-------------|-------|
| 17    | 51,679,639,083 | 56         | 922,850,697      | 56,687,382,646 | 225,846,146 | 61.5  |

**Supplementary Figure 2** K-mer analysis of the *P. maliaceum* genome. Distribution of 17-mer depth calculated from filtered reads of a PCR-free library. The main peak of the distribution curve is at 56. The genome size is estimated using the following formula: Genome size = K-mer Number / Peak Depth.

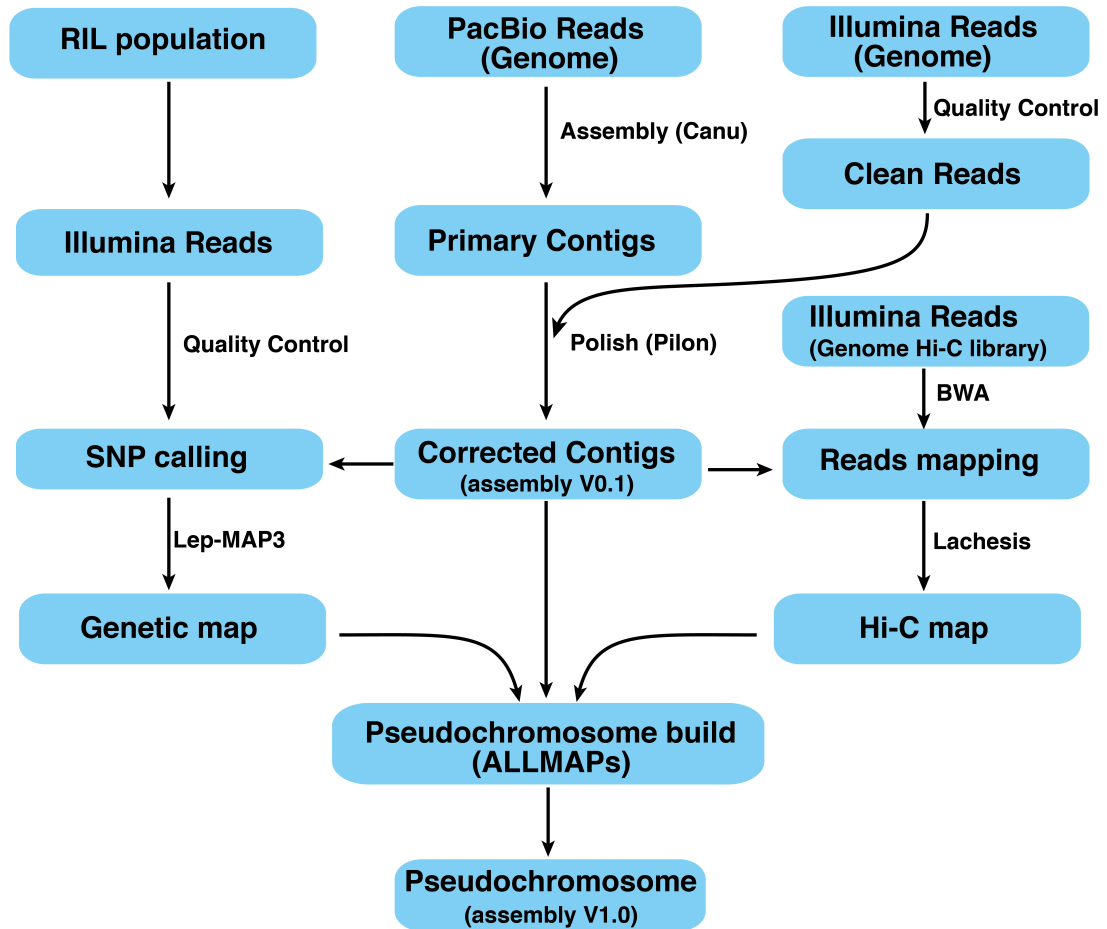

**Supplementary Figure 3** A flowchart indicating the data and main steps used for generating different versions of the broomcorn millet genome assembly.

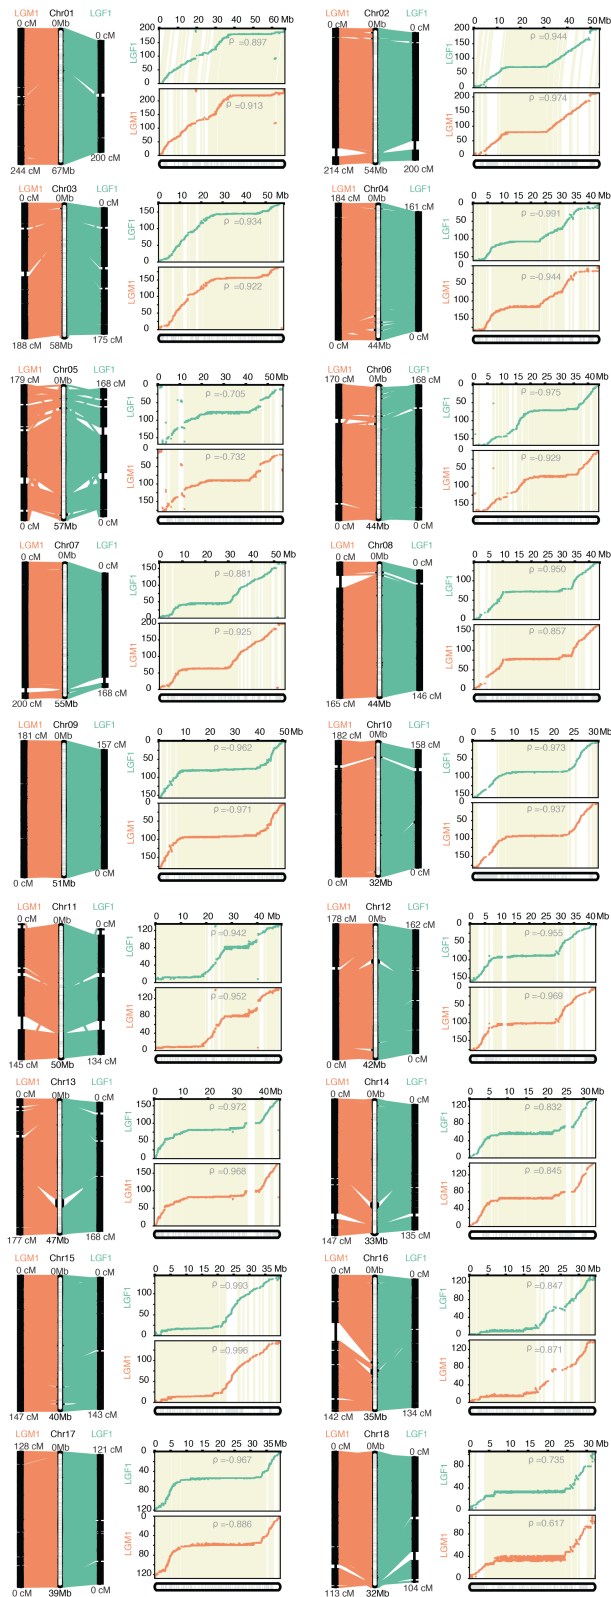

**Supplementary Figure 4** The relationship between the genetic map and the chromosomes of *P. miliaceum*. For each pair of chromosome and linkage groups, the chromosome is indicated in the x-axis and the linkage groups in the y axis.

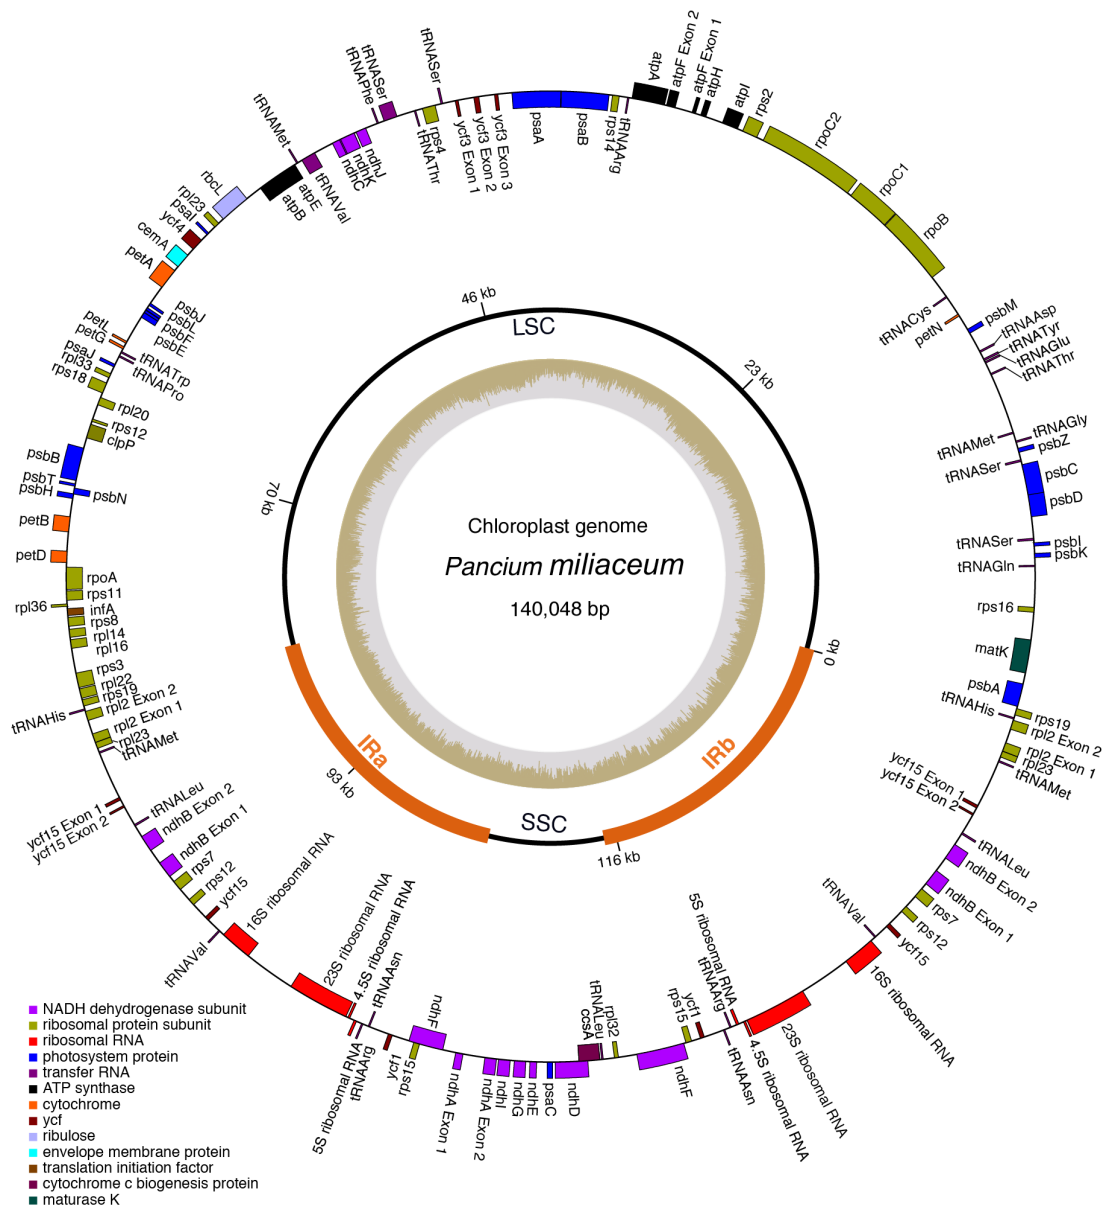

**Supplementary Figure 5** The chloroplast genome of *P. miliaceum*. The inner circle shows the coverage of the chloroplast genome by PacBio reads in non-overlapping 10-bp windows. The middle circle indicates the locations of 4 major regions of the genome, including two inverted repeats regions (IRa and IRb), a small single copy (SSC) region and a large single copy (LSC) region. Gene models are illustrated in the outer circle. Genes on the outside of the circle are transcribed in a counter-clockwise direction and those on the inside are transcribed in a clockwise direction. The color legend indicates genes in different functional classes.

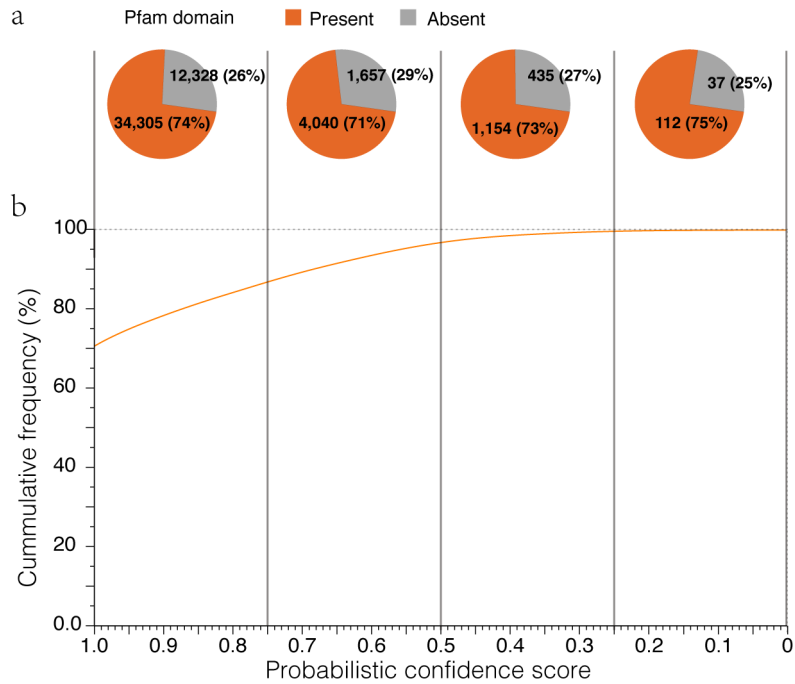

**Supplementary Figure 6** Presence of conserved domains (Pfam) in the Pm\_0390\_v1 gene models. Probabilistic confidence score (PCS) from GLEAN provides a measurement for the uniformity from different pieces of evidence for annotation. PCS ranges from 0 to 1, with 1 indicating perfect agreement of multiple annotation evidence and 0 denoting no evidence support for the annotation. (a) The presence of Pfam domain in genes from each PCS quartile. (b) The cumulative PCS distribution of the final gene model.

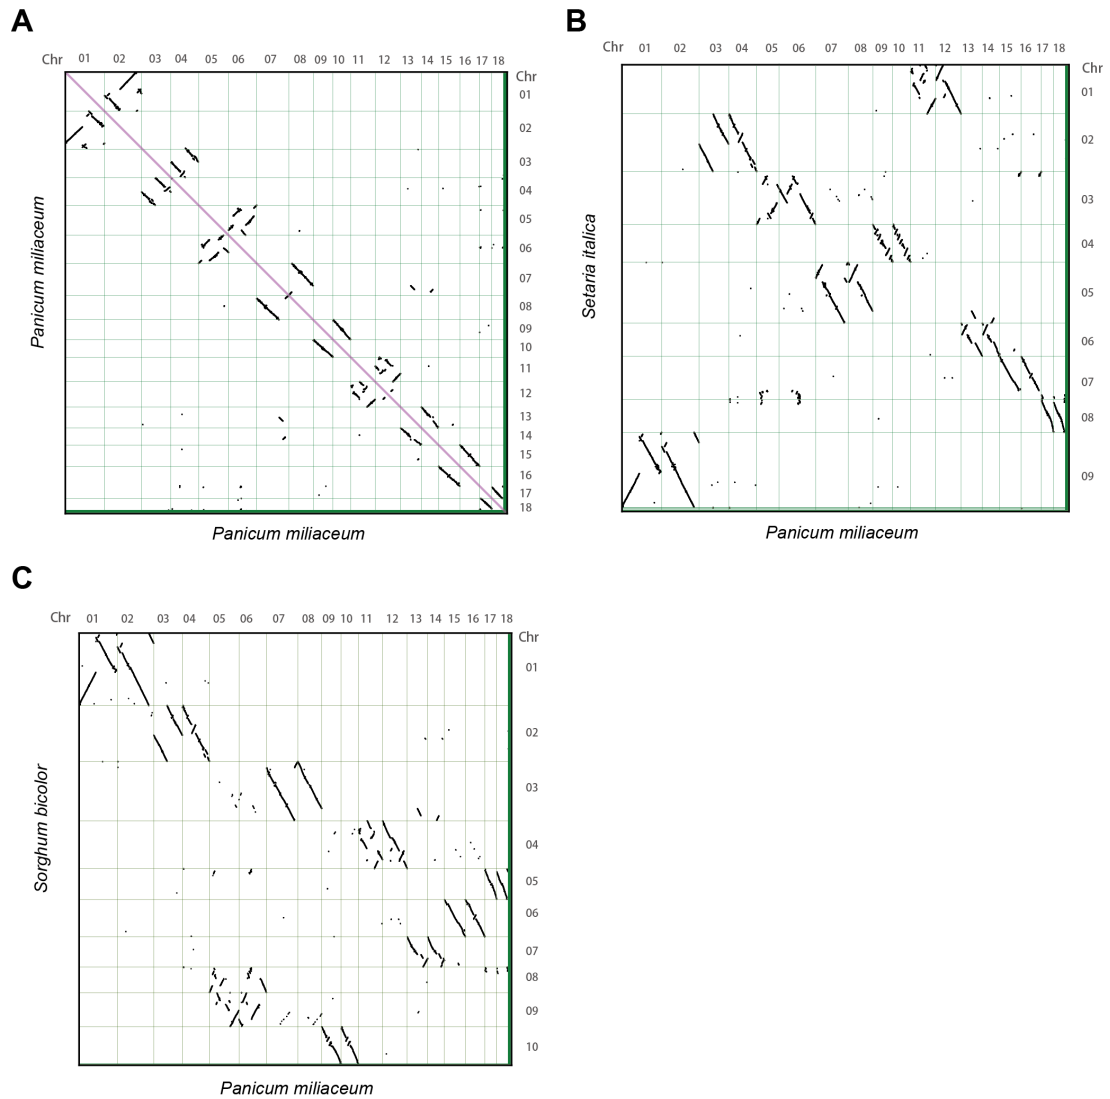

**Supplementary Figure 7** Dot plots showing the syntenic relationship between **a)** homologous chromosomes of broomcorn millet, **b)** broomcorn millet and foxtail millet, and **c)** broomcorn millet and sorghum. Each dot represents a synteny block containing at least 4 pairs of genes.



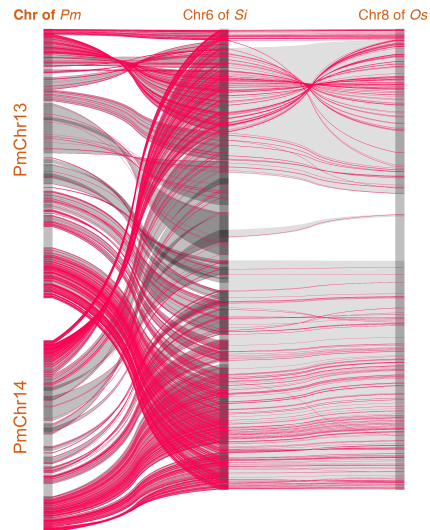

**Supplementary Figure 8** Two-copy orthologous genes (red lines) from broomcorn millet Chr13/Chr14 that are located within syntenic blocks (gray shades) between of broomcorn millet (Pm) and foxtail millet (Si), and orthologous genes between SiChr6 and Chr8 of rice (Os).

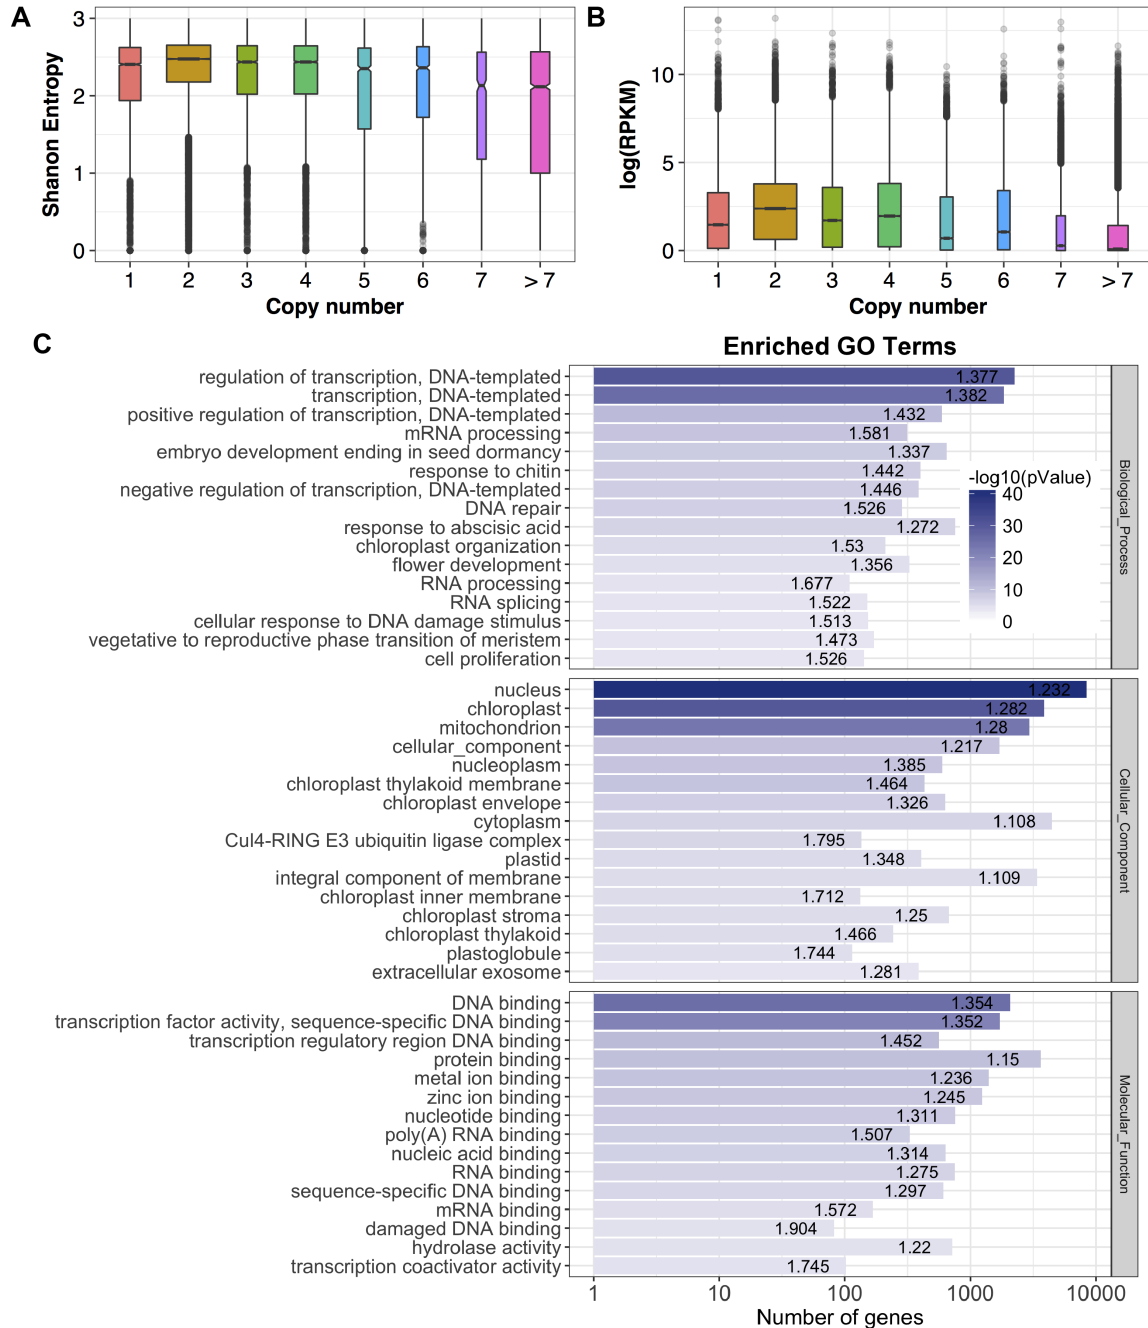

**Supplementary Figure 9.** Distribution of Shannon Entropy (**A**) and gene expression levels (**B**) of broomcorn millet genes belonging to gene families of different sizes. Shannon Entropy was calculated from the mRNA expression level in 8 different types of broomcorn tissue using TCC package of Bioconductor. The gene expression level was shown in log scale, calculated as  $\log_2(\text{RPKM} + 1)$ . (**C**) Enriched gene ontology terms in 2-copy gene families. Only terms with a  $p$ -value  $< 0.0001$  are presented. The enrichment factor are indicated by numbers within each horizontal bar.

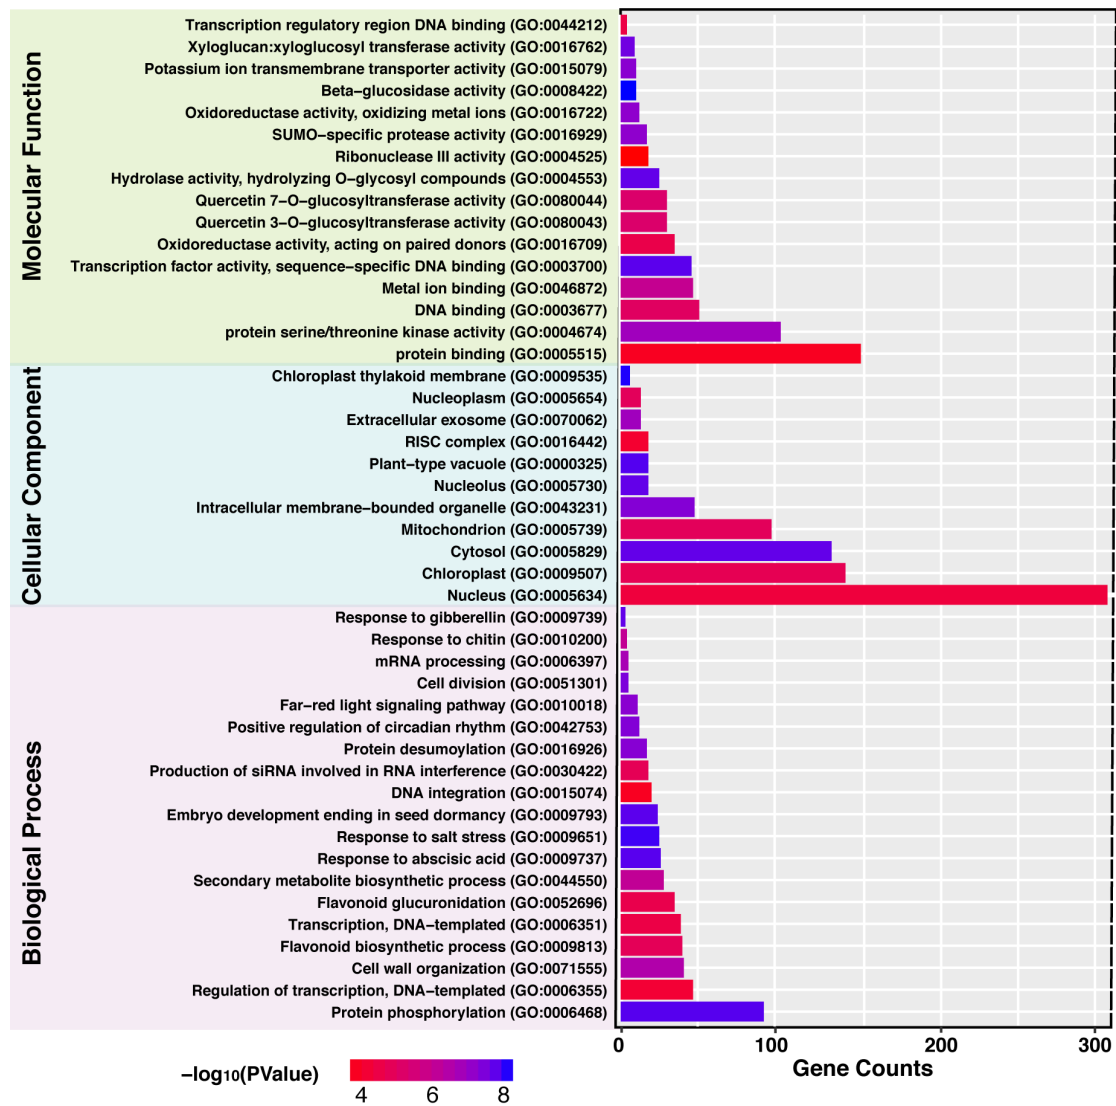

**Supplementary Figure 10** Enriched GO terms in broomcorn millet specific gene families.

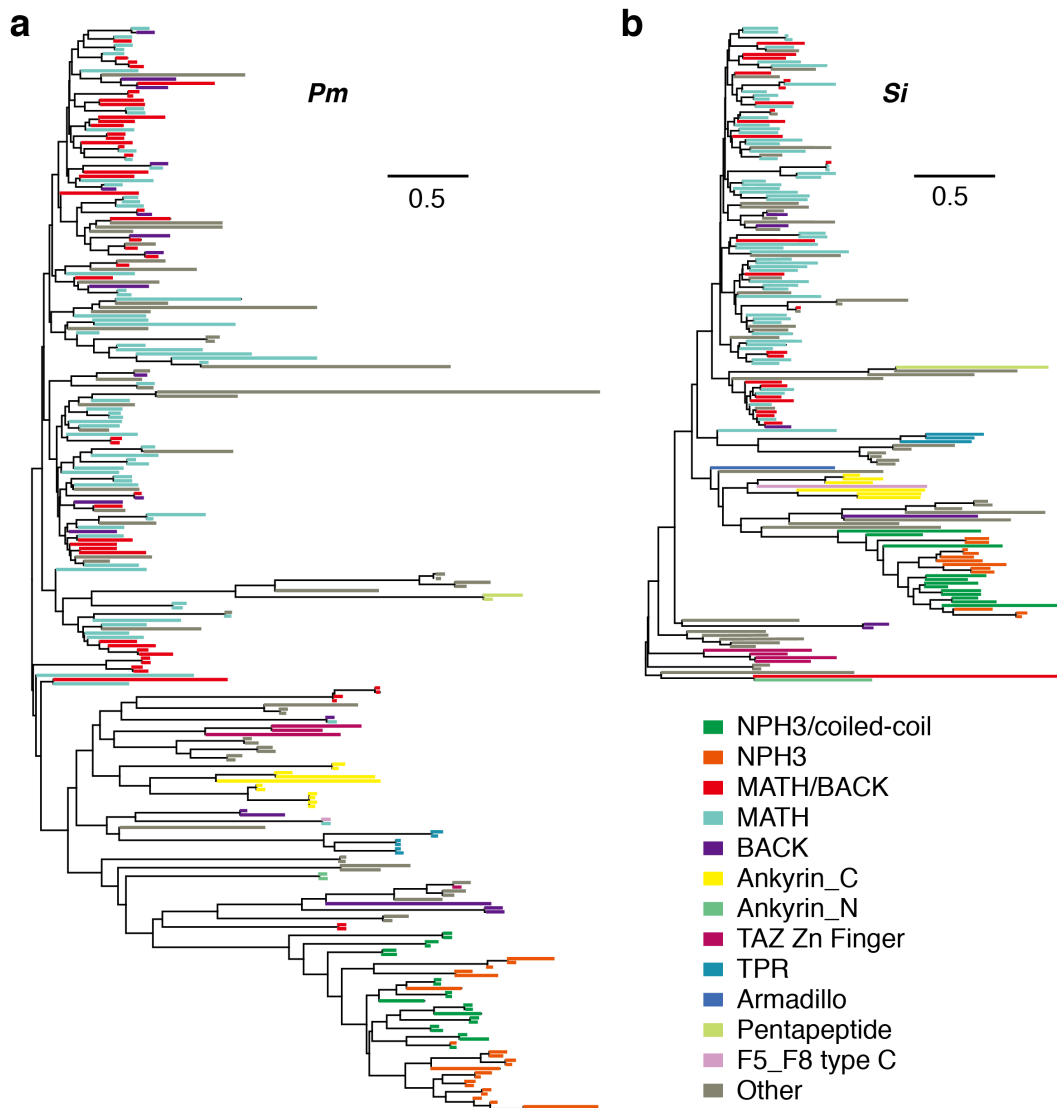

**Supplementary Figure 11** Phylogenetic tree of BTB proteins in broomcorn millet and foxtail millet.

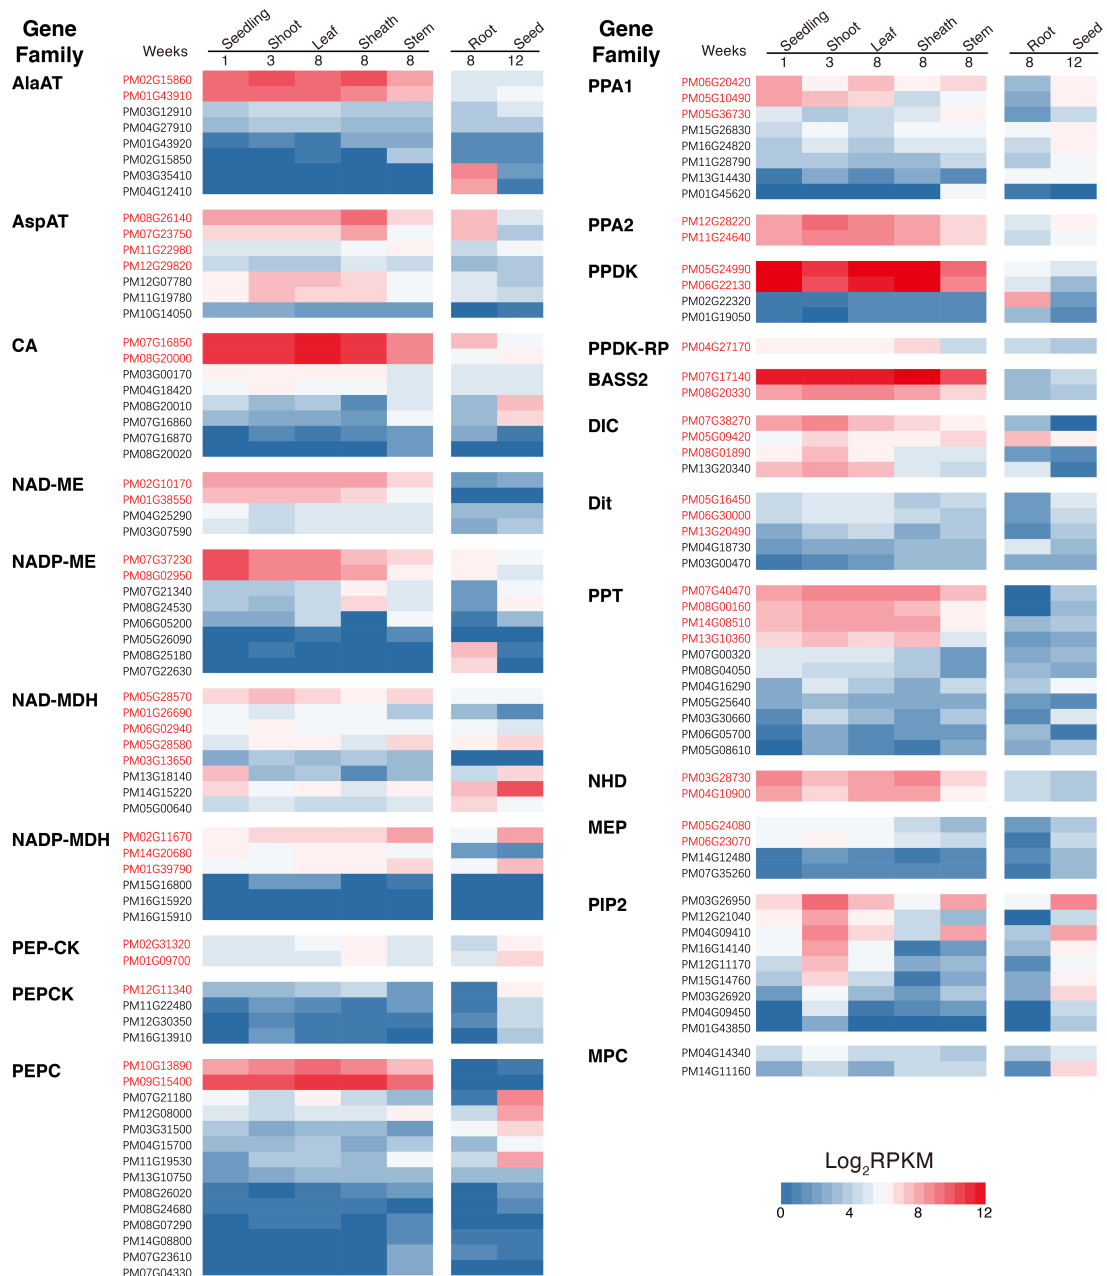

**Supplementary Figure 12** Heatmap showing the expression level of all C4-related genes in different tissues of broomcorn millet. The expression level is presented in the value of  $\log_2(\text{RPKM} + 1)$ . RPKM: reads per kb per million mapped reads.

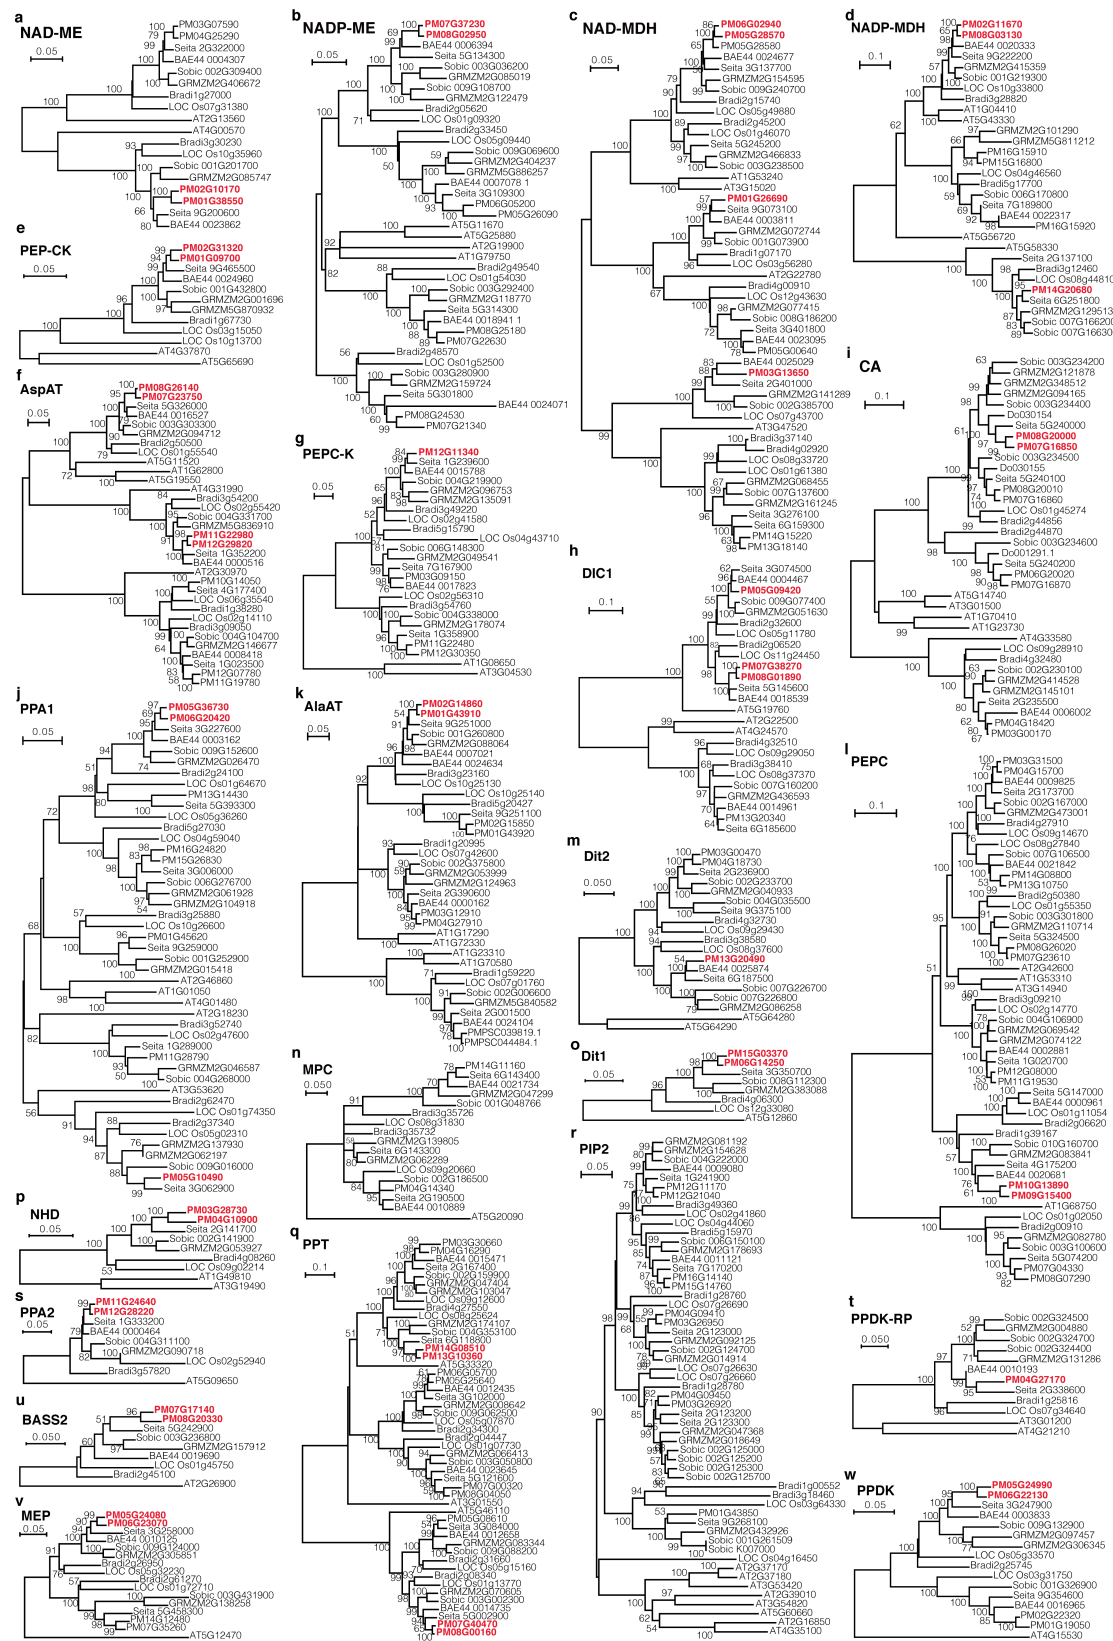

**Supplementary Figure 13** Phylogenetic trees of C4 photosynthesis-related genes. Neighbor-joining trees were generated from multiple codon alignment in MEGA7. Numbers at each branch point indicate the percentage of supports

from 1000 bootstraps. Candidate C4 genes from broomcorn millet are in red fonts. Genes from different plant species are distinguished by the leading letters of the accession. LOC\_Os – rice, PM – broomcorn millet, Pavir – switchgrass, Seita – foxtail millet, Bradi – *Brachypodium distachyon*, GRMZM – maize, Sobic – sorghum, BAE – *Dichanthelium oligosanthes*, At – *Arabidopsis thaliana*.

**Supplementary Table 1** List of sequencing data generated

| Type   | Library               | Platform | Mean Fragment size (bp) | Read length (bp) | Raw data (Gp) | Raw coverage (x) | Effective data (Gp) | Effective coverage (x) |
|--------|-----------------------|----------|-------------------------|------------------|---------------|------------------|---------------------|------------------------|
| Genome | PCR-free              | Illumina | 420                     | 250-250          | 80.27         | 87.00            | 79.69               | 86.36                  |
|        | 20-kb single molecule | PacBio   | -                       | 6,540*           | 81.03         | 87.79            | 81.03               | 87.79                  |
|        | Hi-C                  | Illumina | -                       | 125-125          | 64.98         | 70.40            | 20.88               | 22.62                  |
| RNAseq | 1-week seedlings      | Illumina | 300                     | 125-125          | 25.70         |                  | 24.50               |                        |
|        | 3-week shoot          | Illumina | 300                     | 125-125          | 20.10         |                  | 18.60               |                        |
|        | 8-week leaf blade     | Illumina | 300                     | 125-125          | 38.60         |                  | 36.50               |                        |
|        | 8-week leaf sheath    | Illumina | 300                     | 125-125          | 46.30         |                  | 43.90               |                        |
|        | 8-week inflorescence  | Illumina | 300                     | 125-125          | 16.90         |                  | 25.40               |                        |
|        | 8-week stem           | Illumina | 300                     | 125-125          | 22.10         |                  | 20.60               |                        |
|        | 8-week root           | Illumina | 300                     | 125-125          | 18.20         |                  | 16.80               |                        |
|        | Mature seeds          | Illumina | 300                     | 125-125          | 24.20         |                  | 22.80               |                        |

\* Mean subread length



**Supplementary Table 2** Assembly statistics for broomcorn millet

| <b>Version</b>                        | <b>v0.1</b>       | <b>v1.0</b>               |
|---------------------------------------|-------------------|---------------------------|
| Data source                           | PacBio + Illumina | v0.1 + Genetic map + Hi-C |
| Total assembly size (bp)              | 839,022,999       | 854,674,422               |
| Number of scaffolds ( $\geq 1000$ bp) |                   | 1,309                     |
| Longest scaffold (bp)                 |                   | 66,884,923                |
| Scaffold N50 (bp)                     |                   | 46,661,915                |
| Scaffold L50                          |                   | 8                         |
| Scaffold N90 (bp)                     |                   | 32,167,407                |
| Scaffold L90                          |                   | 17                        |
| Number of contigs                     | 5,541             | 5,541                     |
| Longest contig (bp)                   | 5,222,262         | 5,222,262                 |
| Contig N50 (bp)                       | 368,640           | 368,640                   |
| Contig L50                            | 423               | 423                       |
| Missing bases                         | 0                 | 16,924,001 (1.98%)        |
| Single-base error rate                | 0.004%            | 0.004%                    |

**Supplementary Table 3** The relationship between pseudochromosomes and linkage groups

| The Assembly |                |                        |                              | Genetic Map |            |                   |                                |                                  |
|--------------|----------------|------------------------|------------------------------|-------------|------------|-------------------|--------------------------------|----------------------------------|
| Chromosome   | Length<br>(bb) | Number of<br>Scaffolds | Number of<br>Annotated genes | LG          | Likelihood | Number<br>of SNPs | Genetic Length<br>(cM) of Male | Genetic Length<br>(cM) of Female |
| PmChr01      | 66,884,923     | 312                    | 4968                         | 1           | -1196269.8 | 31311             | 113.66                         | 104.64                           |
| PmChr02      | 53,821,721     | 185                    | 4694                         | 2           | -913269.9  | 18636             | 142.07                         | 134.11                           |
| PmChr03      | 58,436,902     | 263                    | 3721                         | 3           | -1045676.2 | 17438             | 145.24                         | 134.38                           |
| PmChr04      | 43,575,051     | 205                    | 3501                         | 4           | -1103723.9 | 16821             | 178.09                         | 162.16                           |
| PmChr05      | 56,934,218     | 291                    | 3805                         | 5           | -506320.9  | 12737             | 128.05                         | 121.99                           |
| PmChr06      | 43,720,407     | 170                    | 3563                         | 6           | -751863.0  | 12505             | 181.09                         | 157.6                            |
| PmChr07      | 54,759,544     | 264                    | 4061                         | 7           | -1097821.2 | 12410             | 244.03                         | 200.14                           |
| PmChr08      | 43,632,214     | 258                    | 3090                         | 8           | -821035.0  | 12235             | 184.88                         | 161.38                           |
| PmChr09      | 51,032,733     | 384                    | 2508                         | 9           | -819814.4  | 11276             | 188.79                         | 175.86                           |
| PmChr10      | 31,649,554     | 1450                   | 2232                         | 10          | -653746.8  | 11186             | 177.35                         | 168.25                           |
| PmChr11      | 49,540,115     | 279                    | 3120                         | 11          | -606241.1  | 11104             | 147.74                         | 143.21                           |
| PmChr12      | 42,378,805     | 210                    | 3203                         | 12          | -648558.8  | 10612             | 165.75                         | 146.24                           |
| PmChr13      | 46,661,915     | 285                    | 2648                         | 13          | -743653.0  | 10431             | 179.03                         | 168.64                           |
| PmChr14      | 33,171,554     | 193                    | 2164                         | 14          | -685326.2  | 9287              | 200.89                         | 168.36                           |
| PmChr15      | 39,901,388     | 159                    | 2699                         | 15          | -764765.2  | 8981              | 214.17                         | 200.61                           |
| PmChr16      | 34,515,715     | 159                    | 2524                         | 16          | -409706.4  | 6102              | 170.55                         | 168.98                           |
| PmChr17      | 39,340,074     | 257                    | 1538                         | 17          | -259935.7  | 5190              | 147.77                         | 135.64                           |
| PmChr18      | 32,167,407     | 217                    | 1488                         | 18          | -215993.0  | 3525              | 182.64                         | 158.4                            |

**Supplementary Table 4** Alignment of fosmid sequences to Pm\_0390\_v1

| <b>Fosmid ID</b> | <b>Fosmid length (bp)</b> | <b>Target ID</b> | <b>Alignment length (bp)</b> | <b>Identity (%)</b> |
|------------------|---------------------------|------------------|------------------------------|---------------------|
| 1                | 46,699                    | PmChr02          | 45,509                       | 99.99               |
| 2                | 38,693                    | PmChr09          | 35,241                       | 99.96               |
| 3                | 40,744                    | PmChr13          | 40,737                       | 99.93               |
| 4                | 35,746                    | PmChr06          | 35,746                       | 100.00              |
| 5                | 35,720                    | PmChr18          | 35,724                       | 99.98               |
| 6                | 40,239                    | PmChr13          | 40,242                       | 99.99               |
| 7                | 33,170                    | PmChr11          | 33,171                       | 99.99               |
| 8                | 34,568                    | PmChr17          | 34,572                       | 99.68               |
| 9                | 23,811                    | PmChr10          | 23,841                       | 99.53               |
| 10               | 29,566                    | PmChr11          | 29,566                       | 100.00              |

**Supplementary Table 5** Mapping of de novo assembled transcripts to Pm\_0390\_v1

| Dataset | Number  | Total length<br>(Mbp) | Coverage<br>(%) | With >90% sequence |         | With >50% sequence |         |
|---------|---------|-----------------------|-----------------|--------------------|---------|--------------------|---------|
|         |         |                       |                 | identity           |         | identity           |         |
|         |         |                       |                 | Number             | Percent | Number             | Percent |
| All     | 305,520 | 344                   | 98.2            | 289,120            | 94.63   | 300,161            | 98.25   |
| >200bp  | 305,520 | 344                   | 98.2            | 289,120            | 94.63   | 300,161            | 98.25   |
| >500bp  | 193,218 | 307                   | 98.4            | 182,326            | 94.36   | 191,504            | 99.11   |
| >1000b  | 125,499 | 258                   | 98.5            | 118,089            | 94.1    | 124,973            | 99.58   |

**Supplementary Table 6** Summary of BUSCO search results

| <b>Type</b>                         | <b>Number</b> | <b>Percentage (%)</b> |
|-------------------------------------|---------------|-----------------------|
| Complete BUSCOs (C)                 | 1,411         | 98.0                  |
| Complete and single-copy BUSCOs (S) | 590           | 41.0                  |
| Complete and duplicated BUSCOs (D)  | 821           | 57.0                  |
| Fragmented BUSCOs (F)               | 5             | 0.3                   |
| Missing BUSCOs (M)                  | 24            | 1.7                   |
| <b>Total BUSCO groups searched</b>  | <b>1,440</b>  | <b>100.0</b>          |

**Supplementary Table 7** Summary of transposable elements

| <b>Superfamily of TEs</b>   | <b>Length (bp)</b> | <b>Percent of the assembly</b> |
|-----------------------------|--------------------|--------------------------------|
| <b>Class I</b>              |                    |                                |
| <b>LTR retrotransposons</b> |                    |                                |
| Gypsy                       | 326,368,191        | 38.37                          |
| Copia                       | 44,934,433         | 5.28                           |
| Cassandra                   | 237,302            | 0.03                           |
| Caulimovirus                | 260,958            | 0.03                           |
| ERV                         | 181,380            | 0.02                           |
| Pao                         | 107,184            | 0.01                           |
| Ngaro                       | 34,734             | <0.01                          |
| DIRS                        | 3,199              | <0.01                          |
| Unclassified                | 20,722,289         | 2.44                           |
| <b>LINE</b>                 |                    |                                |
| L1                          | 9,986,996          | 1.17                           |
| RTE                         | 2,636,385          | 0.31                           |
| L2                          | 57,874             | 0.01                           |
| I                           | 47,131             | 0.01                           |
| R1                          | 20,710             | <0.01                          |
| Penelope                    | 16,808             | <0.01                          |
| Tad1                        | 12,515             | <0.01                          |
| Other                       | 18,617             | <0.01                          |
| <b>SINE</b>                 | <b>320,031</b>     | <b>0.04</b>                    |
| <b>Class II</b>             |                    |                                |
| CMC                         | 17,983,270         | 2.11                           |
| MULE                        | 6,693,409          | 0.79                           |
| PIF                         | 5,513,518          | 0.65                           |
| hAT                         | 5,030,991          | 0.59                           |
| Helitron                    | 2,988,031          | 0.35                           |
| TcMar                       | 2,510,038          | 0.30                           |
| DNA                         | 542,418            | 0.06                           |
| Dada                        | 122,544            | 0.01                           |
| Crypton                     | 57,571             | 0.01                           |
| Zisupton                    | 43,324             | 0.01                           |
| Maverick                    | 37,692             | <0.01                          |
| P                           | 37,523             | <0.01                          |
| Ginger                      | 26,120             | <0.01                          |
| Kolobok                     | 24,634             | <0.01                          |
| Novosib                     | 21,509             | <0.01                          |
| Sola                        | 19,788             | <0.01                          |
| other                       | 18,649             | <0.01                          |
| <b>Total</b>                | <b>447,637,766</b> | <b>53.60</b>                   |

**Supplementary Table 8** Summary of SSRs identified in broomcorn millet

| <b>Motif</b>    | <b>Counts</b> | <b>Average length (bp)</b> | <b>Average_Mismatches (bp)</b> | <b>Counts / Mbp</b> |
|-----------------|---------------|----------------------------|--------------------------------|---------------------|
| Mononucleotide  | 13,494        | 21                         | 0.19                           | 16.27               |
| Dinucleotide    | 20,059        | 28                         | 0.33                           | 24.19               |
| Trinucleotide   | 31,904        | 21                         | 0.37                           | 38.47               |
| Tetranucleotide | 16,183        | 20                         | 0.15                           | 19.51               |
| Pentanucleotide | 19,304        | 18                         | 0.14                           | 23.28               |
| Hexanucleotide  | 11,214        | 24                         | 0.39                           | 13.52               |
| <b>All</b>      | 112,158       | 22                         | 0.26                           | 22.54               |

**Supplementary Table 9** List of SSR motifs identified in broomcorn millet

| <b>Motif</b> | <b>Counts*</b> | <b>Average length (bp)</b> | <b>Average mismatches (bp)</b> | <b>Counts per Mbp</b> |
|--------------|----------------|----------------------------|--------------------------------|-----------------------|
| CCG          | 12,867         | 19.6                       | 0.39                           | 15.52                 |
| C            | 12,716         | 21.1                       | 0.14                           | 15.33                 |
| AG           | 9,779          | 27.8                       | 0.31                           | 11.79                 |
| AT           | 6,417          | 30.7                       | 0.37                           | 7.74                  |
| AGG          | 4,743          | 23.6                       | 0.61                           | 5.72                  |
| AGC          | 3,637          | 18.6                       | 0.14                           | 4.39                  |
| AAG          | 3,438          | 25.4                       | 0.47                           | 4.15                  |
| AC           | 3,330          | 26.2                       | 0.36                           | 4.02                  |
| AAAAG        | 2,120          | 19.4                       | 0.27                           | 2.56                  |
| AGGG         | 1,690          | 20.0                       | 0.25                           | 2.04                  |
| AAAG         | 1,682          | 20.3                       | 0.23                           | 2.03                  |
| AAAT         | 1,635          | 17.8                       | 0.12                           | 1.97                  |
| ACG          | 1,525          | 19.1                       | 0.30                           | 1.84                  |
| ACC          | 1,436          | 18.6                       | 0.19                           | 1.73                  |
| AAC          | 1,350          | 20.5                       | 0.13                           | 1.63                  |
| ATC          | 1,281          | 22.1                       | 0.36                           | 1.54                  |
| AAT          | 1,211          | 32.4                       | 0.33                           | 1.46                  |
| CCGG         | 1,119          | 17.2                       | 0.07                           | 1.35                  |
| AAAAT        | 1,089          | 17.2                       | 0.08                           | 1.31                  |
| CCGCG        | 973            | 17.2                       | 0.12                           | 1.17                  |
| ATCC         | 830            | 18.3                       | 0.11                           | 1.00                  |
| A            | 778            | 22.4                       | 0.93                           | 0.94                  |
| AGGGG        | 755            | 18.3                       | 0.12                           | 0.91                  |
| AGCCG        | 695            | 17.9                       | 0.11                           | 0.84                  |
| AGGC         | 685            | 17.8                       | 0.08                           | 0.83                  |
| CCCCG        | 668            | 21.7                       | 0.73                           | 0.81                  |
| ATGC         | 663            | 17.2                       | 0.08                           | 0.80                  |
| ATAC         | 649            | 44.9                       | 0.29                           | 0.78                  |
| CCCG         | 610            | 17.7                       | 0.13                           | 0.74                  |
| ACGC         | 581            | 17.6                       | 0.08                           | 0.70                  |
| AGAGG        | 580            | 19.1                       | 0.24                           | 0.70                  |
| AGAGC        | 563            | 17.5                       | 0.13                           | 0.68                  |
| CG           | 533            | 16.9                       | 0.11                           | 0.64                  |
| ATAG         | 525            | 25.8                       | 0.31                           | 0.63                  |
| AATC         | 516            | 18.4                       | 0.11                           | 0.62                  |
| ATACC        | 510            | 15.3                       | 0.00                           | 0.62                  |
| AGCG         | 504            | 17.3                       | 0.07                           | 0.61                  |

\*Only motifs with more than 500 counts were listed



**Supplementary Table 10** Summary of gene model metrics from different software

| Method               | Gene number   | Average Length (bp) |              |            |            | Number of Exons per Gene | Source       | Version    |
|----------------------|---------------|---------------------|--------------|------------|------------|--------------------------|--------------|------------|
|                      |               | Gene                | CDS          | Exon       | Intron     |                          |              |            |
| <i>Ab initio</i>     |               |                     |              |            |            |                          |              |            |
| Augustus             | 69,693        | 2,238               | 818          | 245        | 605        | 3.3                      |              |            |
| Genescan             | 83,305        | 4,571               | 721          | 221        | 1,696      | 3.3                      |              |            |
| GlimmerHMM           | 229,575       | 2,273               | 518          | 199        | 1,093      | 2.6                      |              |            |
| SNAP                 | 108,528       | 4,078               | 637          | 204        | 1,617      | 3.1                      |              |            |
| Fgenesh              | 67,227        | 2,848               | 1,113        | 230        | 452        | 4.8                      |              |            |
| <i>Homology</i>      |               |                     |              |            |            |                          |              |            |
| <i>B. distachyon</i> | 79,246        | 2,587               | 1,131        | 314        | 561        | 3.6                      | Phytozome 12 | 314_v3.0   |
| <i>O. sativa</i>     | 94,948        | 2,012               | 1,021        | 346        | 508        | 3                        | Phytozome 12 | 323_v7.0   |
| <i>S. italica</i>    | 83,430        | 2,629               | 1,090        | 301        | 587        | 3.6                      | Phytozome 12 | 312_v2     |
| <i>S. bicolor</i>    | 89,416        | 2,314               | 1,150        | 338        | 484        | 3.4                      | Phytozome 12 | 454_v3.0.1 |
| <i>A. thaliana</i>   | 81,912        | 1,466               | 750          | 276        | 418        | 2.7                      | Phytozome 12 | TAIR10     |
| <i>T. aestivum</i>   | 61,160        | 2,812               | 1,251        | 329        | 557        | 3.8                      | Phytozome 12 | 296_v2.2   |
| <i>Z. mays</i>       | 77,753        | 2,407               | 1,093        | 327        | 562        | 3.3                      | Phytozome 12 | 284_AGPv3  |
| mRNA-seq             | 30,214        | 3,771               | 1,466        | 216        | 398        | 6.8                      |              |            |
| <b>GLEAN</b>         | <b>55,930</b> | <b>3,260</b>        | <b>1,172</b> | <b>248</b> | <b>461</b> | <b>4.7</b>               |              |            |

**Supplementary Table 11** Summary of noncoding RNAs in broomcorn millet

| Type         | Copy<br>Number | Average<br>Length (bp) | Total<br>Length (bp) | Proportion of genome<br>(%) |
|--------------|----------------|------------------------|----------------------|-----------------------------|
| miRNA        | 339            | 141.5                  | 47,984               | 0.01                        |
| tRNA         | 1,420          | 75.1                   | 106,645              | 0.01                        |
| rRNA         |                |                        |                      |                             |
| 18S          | 161            | 1469.8                 | 236,642              | 0.03                        |
| 28S          | 531            | 142.4                  | 75,597               | 0.01                        |
| 5.8S         | 124            | 157.3                  | 19,504               | <0.01                       |
| 5S           | 824            | 103.9                  | 85,616               | 0.01                        |
| snRNA        |                |                        |                      |                             |
| CD-box       | 2,050          | 105.2                  | 215,756              | 0.02                        |
| HACA-box     | 89             | 129.3                  | 11,512               | <0.01                       |
| splicing     | 163            | 150.7                  | 24,557               | <0.01                       |
| <b>Total</b> | <b>5,701</b>   |                        | <b>823,813</b>       | <b>0.09</b>                 |

**Supplementary Table 12** Number of broomcorn millet genes identified in functional databases

|                   | <b>Database</b> | <b>Number</b> | <b>Percent (%)</b> |
|-------------------|-----------------|---------------|--------------------|
| Total Genes       |                 | 55,930        | -                  |
| Annotation        | InterPro        | 36,513        | 65.3               |
|                   | GO              | 46,973        | 83.9               |
|                   | KEGG            | 28,158        | 50.3               |
|                   | KOG             | 53,474        | 95.6               |
|                   | Swissprot       | 36,737        | 65.7               |
|                   | TrEMBL          | 53,097        | 94.9               |
| Total Annotated   |                 | 54,003        | 96.6               |
| Total Unannotated |                 | 1,927         | 3.4                |

**Supplementary Table 13** Gene copy number of transcription factor families in broomcorn millet

| Family      | Species   |           |           |           |           |           |           |
|-------------|-----------|-----------|-----------|-----------|-----------|-----------|-----------|
|             | <i>Pm</i> | <i>Si</i> | <i>Zm</i> | <i>Sb</i> | <i>Os</i> | <i>Bd</i> | <i>At</i> |
| AP2         | 50        | 26        | 28        | 24        | 16        | 25        | 18        |
| ARF         | 41        | 24        | 35        | 25        | 27        | 26        | 22        |
| ARR-B       | 14        | 12        | 9         | 13        | 9         | 13        | 14        |
| B3          | 92        | 58        | 51        | 60        | 54        | 51        | 64        |
| BBR-BPC     | 6         | 3         | 4         | 5         | 4         | 3         | 7         |
| BES1        | 13        | 10        | 10        | 9         | 6         | 8         | 8         |
| C2H2        | 99        | 65        | 48        | 51        | 56        | 49        | 55        |
| C3H         | 82        | 36        | 55        | 40        | 46        | 43        | 47        |
| CAMTA       | 14        | 7         | 7         | 8         | 6         | 7         | 6         |
| CO-like     | 22        | 14        | 16        | 13        | 15        | 13        | 17        |
| CPP         | 20        | 10        | 12        | 8         | 11        | 9         | 8         |
| DBB         | 15        | 9         | 12        | 10        | 10        | 9         | 8         |
| Dof         | 50        | 35        | 44        | 30        | 30        | 29        | 36        |
| E2F/DP      | 18        | 9         | 17        | 11        | 8         | 11        | 8         |
| EIL         | 15        | 6         | 7         | 8         | 9         | 6         | 6         |
| ERF         | 257       | 163       | 174       | 145       | 137       | 133       | 119       |
| FAR1        | 77        | 46        | 18        | 49        | 75        | 124       | 17        |
| G2-like     | 83        | 45        | 48        | 40        | 44        | 48        | 39        |
| GATA        | 56        | 31        | 38        | 30        | 25        | 29        | 30        |
| GRAS        | 118       | 57        | 93        | 81        | 60        | 63        | 34        |
| GRF         | 19        | 10        | 15        | 8         | 12        | 12        | 9         |
| GeBP        | 21        | 16        | 19        | 13        | 13        | 13        | 20        |
| HB-PHD      | 4         | 2         | 3         | 3         | 1         | 3         | 2         |
| HB-other    | 12        | 6         | 22        | 5         | 11        | 11        | 6         |
| HD-ZIP      | 83        | 49        | 57        | 44        | 42        | 40        | 48        |
| HRT-like    | 2         | 2         | 1         | 1         | 1         | 1         | 2         |
| HSF         | 10        | 27        | 25        | 24        | 25        | 24        | 24        |
| LBD         | 59        | 33        | 37        | 34        | 36        | 28        | 43        |
| LFY         | 2         | 1         | 2         | 1         | 2         | 1         | 1         |
| LSD         | 7         | 5         | 6         | 5         | 6         | 5         | 3         |
| M-type_MADS | 34        | 32        | 32        | 40        | 32        | 45        | 66        |

| Family       | Species     |             |             |             |             |             |             |
|--------------|-------------|-------------|-------------|-------------|-------------|-------------|-------------|
|              | <i>Pm</i>   | <i>Si</i>   | <i>Zm</i>   | <i>Sb</i>   | <i>Os</i>   | <i>Bd</i>   | <i>At</i>   |
| MIKC_MADS    | 30          | 37          | 43          | 38          | 37          | 34          | 42          |
| MYB          | 196         | 135         | 162         | 130         | 122         | 123         | 144         |
| MYB_related  | 110         | 73          | 107         | 80          | 62          | 57          | 56          |
| NAC          | 202         | 134         | 128         | 127         | 139         | 128         | 112         |
| NF-X1        | 3           | 2           | 4           | 3           | 2           | 2           | 2           |
| NF-YA        | 20          | 10          | 18          | 9           | 11          | 7           | 10          |
| NF-YB        | 27          | 16          | 19          | 14          | 13          | 18          | 13          |
| NF-YC        | 26          | 16          | 17          | 15          | 16          | 15          | 14          |
| Nin-like     | 25          | 17          | 15          | 13          | 13          | 16          | 14          |
| RAV          | 6           | 6           | 3           | 3           | 4           | 4           | 6           |
| S1Fa-like    | 2           | 1           | 1           | 1           | 2           | 1           | 3           |
| SBP          | 34          | 19          | 35          | 19          | 19          | 17          | 17          |
| SRS          | 13          | 5           | 11          | 6           | 5           | 6           | 11          |
| STAT         | 2           | 1           | 1           | 1           | 1           | 1           | 2           |
| TALE         | 40          | 23          | 29          | 23          | 26          | 22          | 21          |
| TCP          | 37          | 22          | 40          | 20          | 21          | 21          | 24          |
| Trihelix     | 54          | 36          | 45          | 32          | 31          | 30          | 29          |
| VOZ          | 4           | 2           | 6           | 2           | 2           | 2           | 2           |
| WOX          | 22          | 13          | 21          | 12          | 14          | 13          | 16          |
| WRKY         | 157         | 108         | 121         | 97          | 101         | 88          | 72          |
| Whirly       | 3           | 2           | 2           | 2           | 2           | 2           | 3           |
| YABBY        | 17          | 9           | 13          | 8           | 8           | 8           | 6           |
| ZF-HD        | 27          | 16          | 22          | 14          | 14          | 21          | 17          |
| bHLH         | 248         | 161         | 170         | 153         | 137         | 131         | 137         |
| bZIP         | 156         | 85          | 115         | 93          | 89          | 83          | 71          |
| <b>Total</b> | <b>2856</b> | <b>1798</b> | <b>2093</b> | <b>1753</b> | <b>1720</b> | <b>1732</b> | <b>1631</b> |

**Supplementary Table 14** Copy number of C4 photosynthesis related genes

| Gene     | Species   |           |           |           |           |           |           |           |
|----------|-----------|-----------|-----------|-----------|-----------|-----------|-----------|-----------|
|          | <i>Pm</i> | <i>Si</i> | <i>Do</i> | <i>Zm</i> | <i>Sb</i> | <i>Bd</i> | <i>Os</i> | <i>At</i> |
| CA       | 8         | 4         | 4         | 5         | 5         | 3         | 2         | 5         |
| NAD-ME   | 4         | 2         | 2         | 2         | 2         | 2         | 2         | 2         |
| NADP-ME  | 8         | 4         | 4         | 6         | 5         | 4         | 4         | 4         |
| NAD-MDH  | 8         | 7         | 4         | 7         | 6         | 6         | 7         | 4         |
| NADP-MDH | 6         | 4         | 2         | 4         | 4         | 3         | 3         | 4         |
| PEP-CK   | 2         | 1         | 1         | 2         | 1         | 1         | 2         | 2         |
| PEPC-K   | 4         | 3         | 2         | 4         | 3         | 3         | 3         | 2         |
| PEPC     | 14        | 7         | 6         | 8         | 7         | 7         | 7         | 6         |
| PPA1     | 8         | 6         | 1         | 7         | 5         | 6         | 7         | 5         |
| PPA2     | 2         | 1         | 1         | 2         | 1         | 1         | 1         | 1         |
| PPDK     | 4         | 2         | 2         | 2         | 2         | 1         | 2         | 1         |
| PPDK-RP  | 1         | 1         | 1         | 2         | 3         | 1         | 1         | 2         |
| PIP2     | 9         | 6         | 2         | 8         | 9         | 6         | 7         | 8         |
| Dit2     | 3         | 3         | 1         | 2         | 4         | 2         | 2         | 2         |
| Dit1     | 2         | 1         | 0         | 1         | 1         | 1         | 1         | 1         |
| PPT      | 11        | 6         | 5         | 8         | 6         | 5         | 6         | 3         |
| BASS2    | 2         | 1         | 1         | 1         | 1         | 1         | 1         | 1         |
| NHD      | 2         | 1         | 0         | 1         | 1         | 1         | 1         | 2         |
| MEP      | 4         | 2         | 1         | 2         | 2         | 2         | 2         | 1         |
| DIC1     | 4         | 3         | 3         | 2         | 2         | 4         | 4         | 3         |
| MPC      | 2         | 3         | 2         | 3         | 2         | 2         | 2         | 1         |
| AlaAT    | 8         | 4         | 4         | 5         | 4         | 4         | 5         | 2         |
| AspAT    | 7         | 4         | 3         | 3         | 3         | 4         | 4         | 5         |

*Do*, *D. oligosanthos*; *Pm*, *P. miliaceum*; *Si*, *S. italic*; *Sb*, *S. bicolor*; *Zm*, *Z. mays*; *Bd*, *B. distachyon*; *Os*, *O. sativa*; *At*, *A. thaliana*
