# Supplementary material for: The genome of broomcorn millet
Source: PubMed Central journal article supplement (PMC6347628; doi:10.1038/s41467-019-08409-5), 2019-01-25
Supplement: 41467_2019_8409_MOESM3_ESM.pdf [file 41467_2019_8409_MOESM3_ESM.pdf]

## **Description of Additional Supplementary Files**

File Name: Supplementary Data 1

Description: Gene Ontology annotations and gene expression levels of 8 different tissues of broomcorn millet. Average RPKM (reads per kilobases per million) values of biological replicates were given.
